# Supplementary material for: Arg1 expression defines immunosuppressive subsets of tumor-associated macrophages
Source: PubMed Central journal article supplement — Theranostics. 2018 Nov 12;8(21):5842–54. doi: 10.7150/thno.26888 (PMC6299430; doi:10.7150/thno.26888), 2018-11-12
Supplement: thnov08p5842s1.pdf [file thnov08p5842s1.pdf]

**Fig. S1: Intravital imaging of Arg1<sup>+</sup> macrophages in non-tumor tissue.** Arg1-eYFP (green) mouse organs were resected after i.v. administration of macrophage (Cascade Blue dextran; Blue) and vascular (rhodamine lectin; red) imaging agents. Representative confocal images of (A) liver, (B) lung, (C) spleen, and (D) heart.

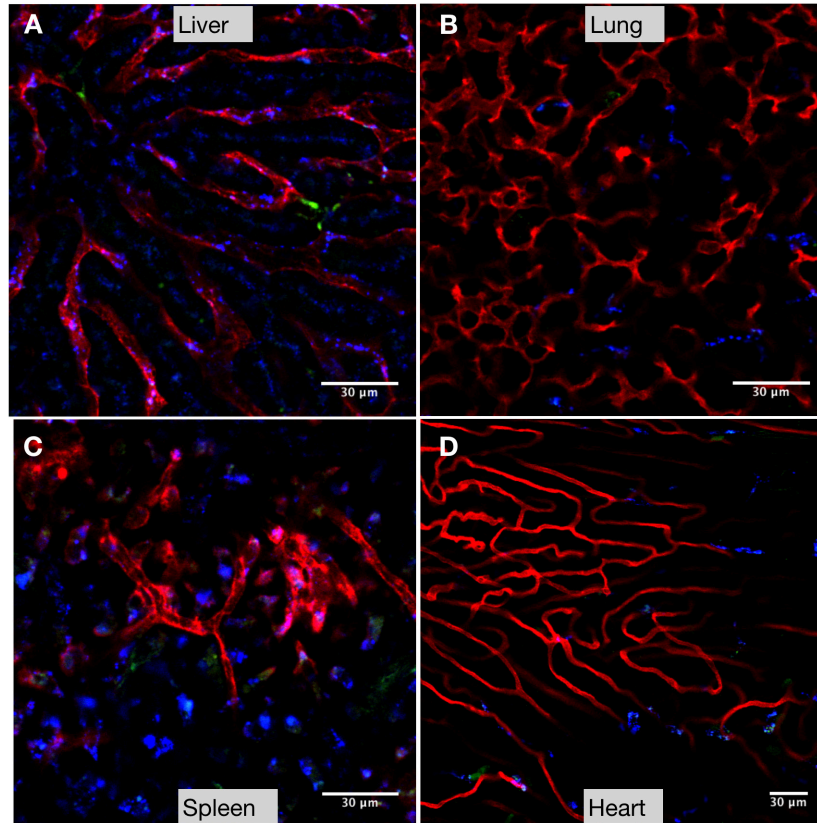

**Fig. S2: Flow cytometric analysis of Arg1 expression in tumor immune cells.** **A.** FACS plots showing gating of MC38 TAM (CD45+ Ly6G- CD90- F4/80+) from Arg1-eYFP mice analyzed by flow cytometry. **B.** Gating of Arg1+ immune cells into sub-clusters to compare the percentage of Arg1+ TAM (F4/80+) to other immune populations. Values represent mean  $\pm$  S.E.M. for 4 MC38 tumors plotted individually as grey circles.

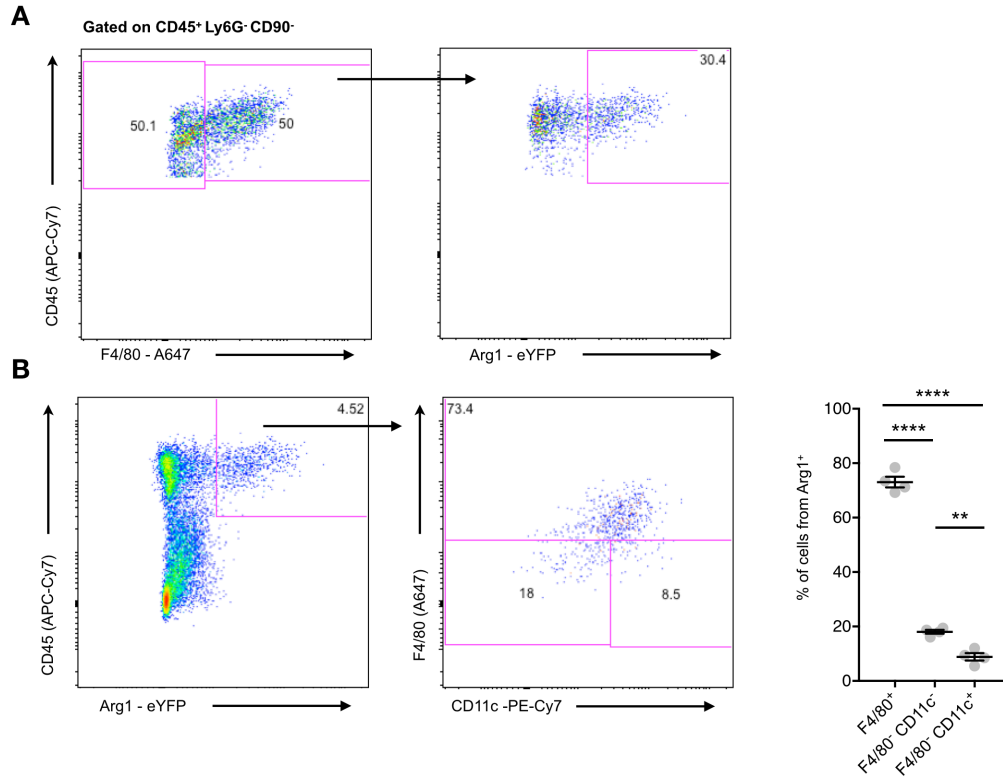

**Fig. S3: Image analysis of Arg1 cells defined by motility.** Bar graphs showing (A) motility coefficient and (B) instantaneous velocity calculated for Arg1+ macrophages (n = 54) in MC38 tumor core or periphery. \*\*\*\*P < 0.0001.

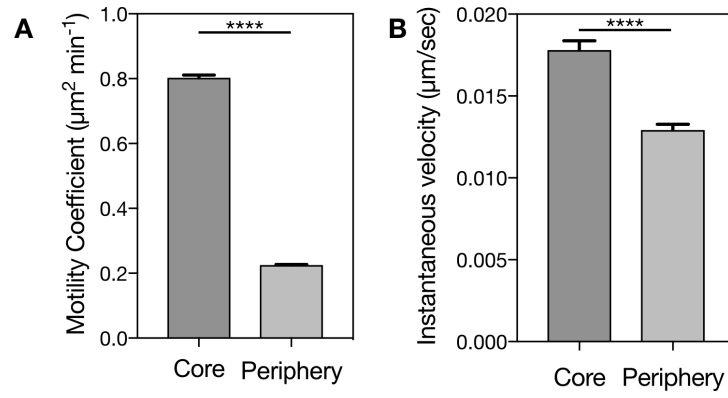

**Fig. S4: Intravital imaging of EL4 mouse lymphoma model.** **A.** Low resolution intravital microscopy images of Arg1<sup>+</sup> macrophages (green) in EL4-H2B-mApple (red) tumors implanted in Arg1-eYFP reporter mice. The tumor margin is demarcated with a white solid line. **B.** Representative high resolution intravital microscopy image of EL4 (red) tumor cells at the tumor margin showing Arg1<sup>+</sup> macrophage (green) phenotypes. **C.** Arg1<sup>+</sup> macrophage shape analysis performed at the tumor core and periphery. Values represent mean  $\pm$  SEM for 2 mice. \*\*\*\*P < 0.0001 (Student's t test).

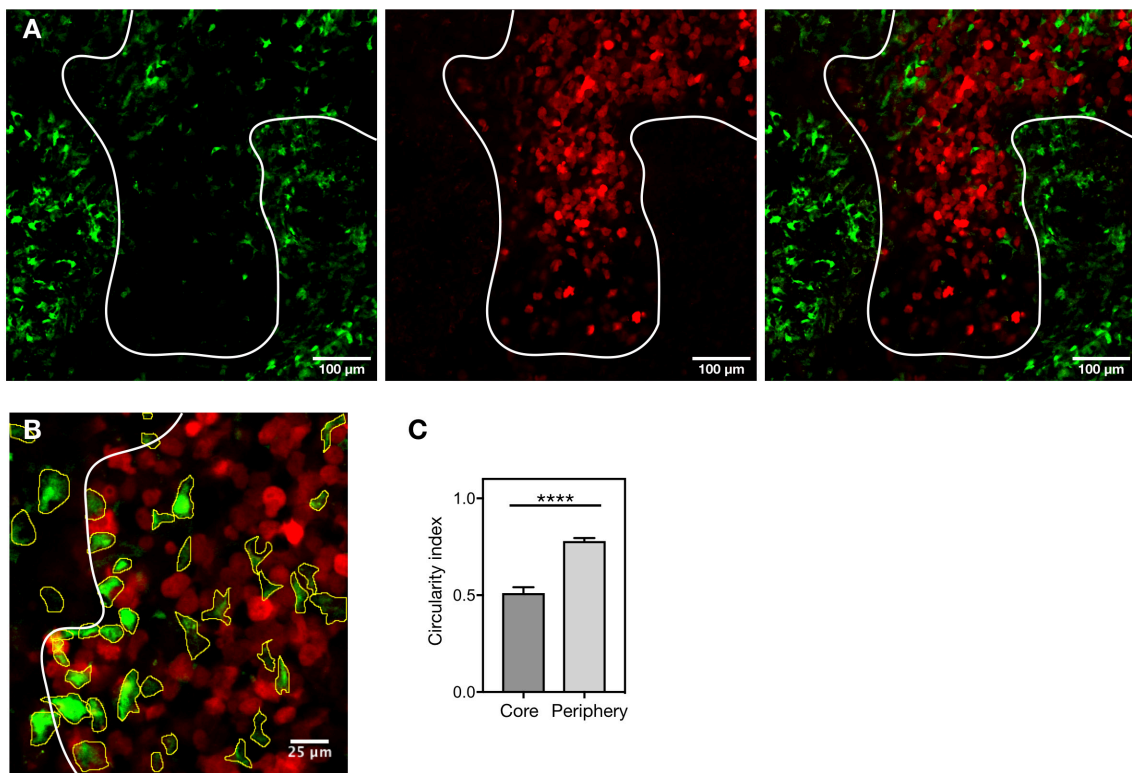

**Fig. S5: In situ imaging of Arg1 expression in an orthotopic melanoma model.** **A.** A representative confocal image of B16-H2B-mApple (red) tumor cells and Arg1-eYFP TAM (green) at the core of a surgically removed tumor from the flank of a reporter mouse. Yellow ROIs overlaid to highlight shape phenotype. **B.** Peripheral Arg1-eYFP cells at the tumor margin (solid white line) with yellow ROIs overlaid to highlight shape phenotype. **C.** Plotted mean circularity index of Arg1-eYFP<sup>+</sup> TAM at the tumor core and periphery. Values represent mean  $\pm$  SEM for 4 mouse tumors. \*\*\*\*P < 0.0001 (Student's t test).

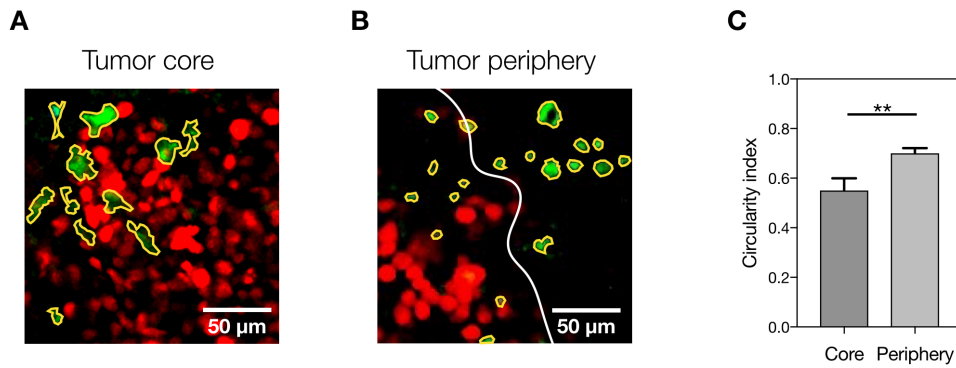

**Fig. S6: In situ imaging of Arg1 phenotypes in MC38 tumors independent of dorsal skin-fold model.** **A.** A representative microscopy image showing the core region of an intradermal MC38-H2B-mApple tumor surgically-resected from an Arg1-eYFP mouse. Yellow outlines representing ROIs from thresholded Arg1+ cells were used to plot Arg1 expression (eYFP mean fluorescence intensity) vs. circularity index. **B.** A representative image from the same tumor at the periphery (margin demarcated by solid white line) with a positive trend shown on a plot of Arg1 expression vs. circularity index. **C.** Mean Arg1 expression at the core and periphery of 4 independent MC38 tumors. Values represent mean  $\pm$  SEM. \*\*\*\* $P < 0.0001$  (Student's t test).

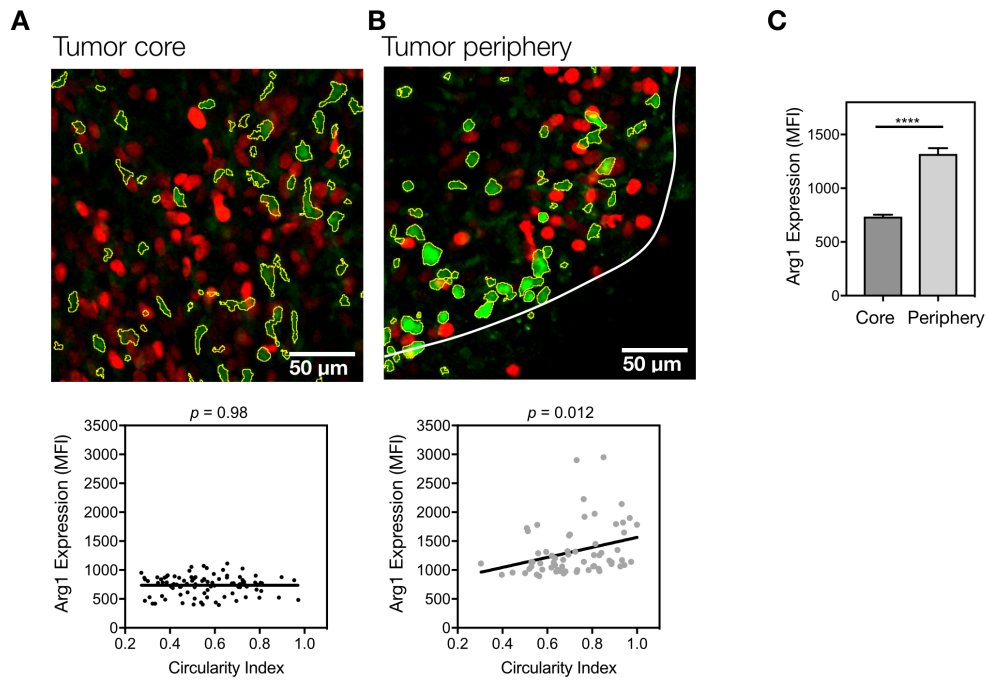

**Fig. S7: scRNA seq for putative macrophage gene markers.** tSNE plots showing expression of each indicated gene across all CD45+ immune cells queried in an MC38 tumor.

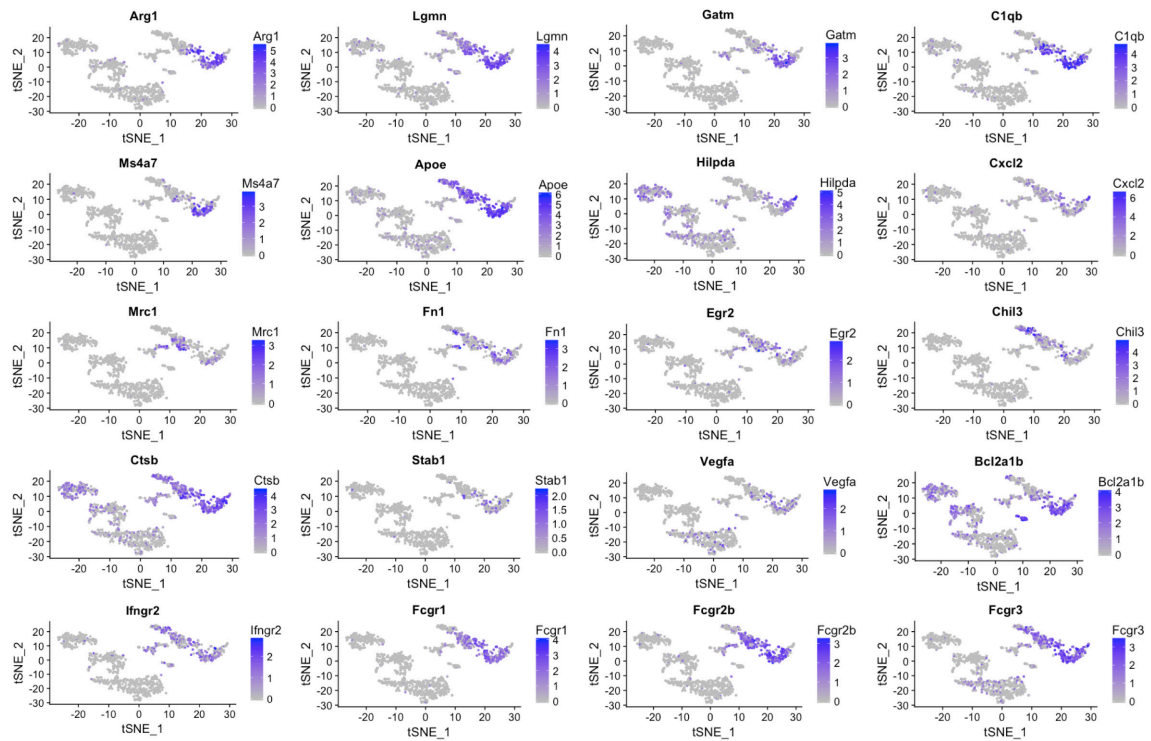

**Fig. S8: scRNA seq identification of Arg1A and Arg1B discriminating genes. (A)** Violin plots showing probability distribution of Arg1, Arg1A-specific genes (Gbp2b, Bst1), and genes that discriminate Arg1A from Arg1B (Ccl6, Ccl9, F13a1). **(B)** Violin plots showing Arg1B-specific genes (Ms4a7, Sgk1, Pmepa1) and genes that discriminate Arg1B from Arg1A (Cd72, Cxcl16, Rgs1). Values were obtained from untreated MC38 tumor tissue pre-sorted on CD45+ cells.

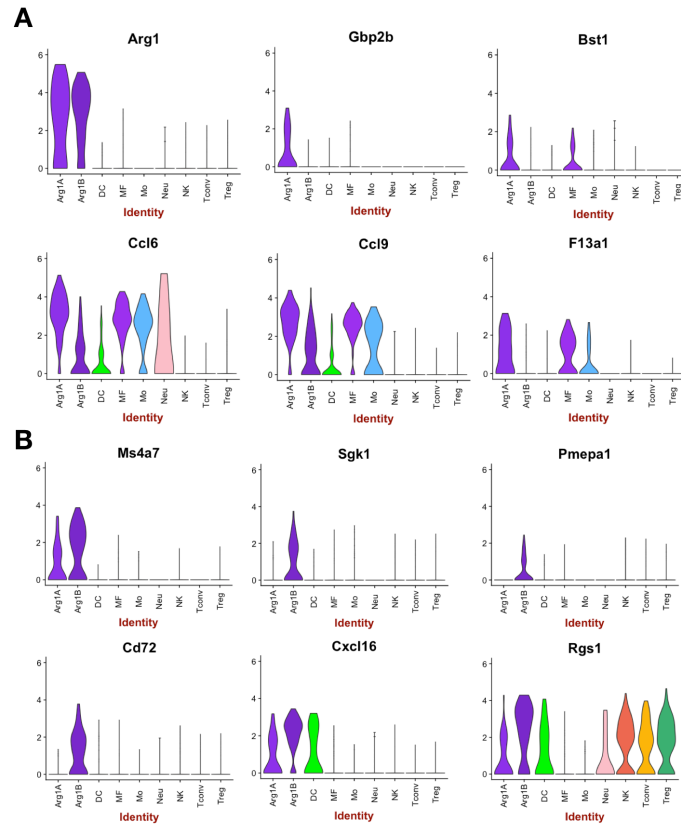



**Fig. S9: Arg1A gene expression and shape by histological staining.** **A.** Staining for the Arg1A-specific gene product GBP1 (green) in histological sections prepared from MC38-H2B-mApple (red) tumor tissue co-stained with DAPI (blue) for cell nuclei identification. **B.** Average perinuclear expression of GBP1 quantified across 3 tumors. Values represent mean  $\pm$  SEM. \*\*\*\*P < 0.0001 (Student's t test).

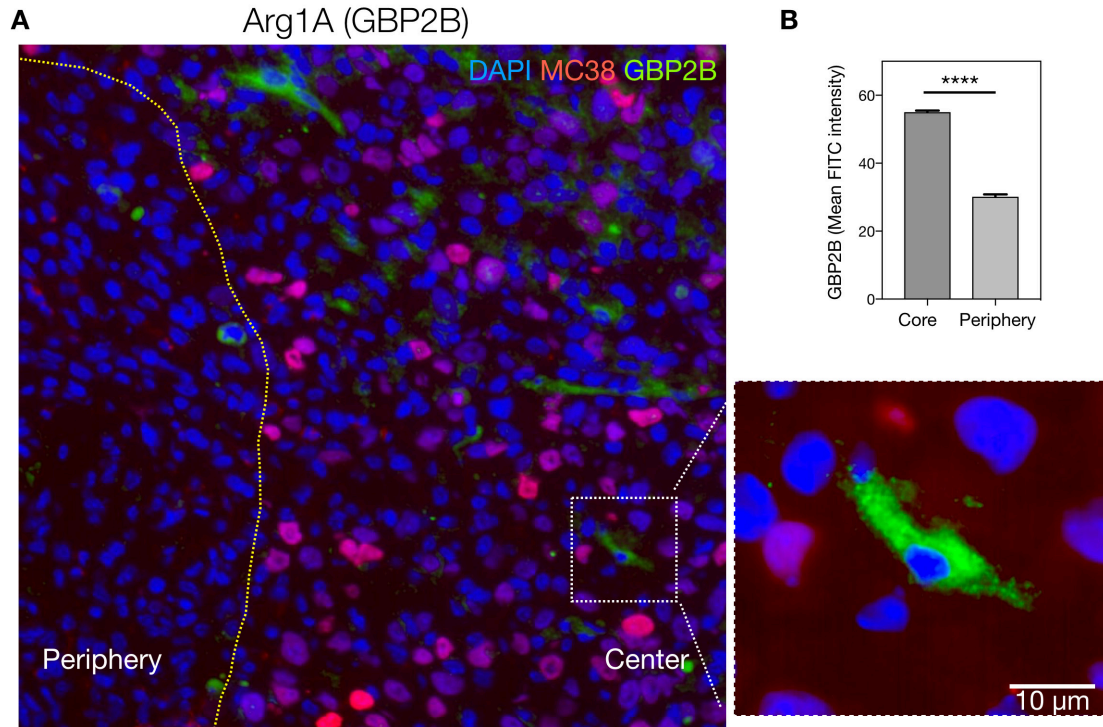

**Fig. S10: Gene enrichment analysis of macrophage populations. A.** Differential gene expression from MC38 tumor scRNA seq data showing common pathways shared among genes enriched in the Arg1A cluster relative to the Arg1B cluster. **B.** Differential gene expression from scRNA seq data showing common pathways shared among genes enriched in MC38 tumor macrophages after treatment with aPD-1. GO Function terms are plotted against their Fisher Exact P-Value and colored according to pathways of interest. Black bars indicate “other” pathways.

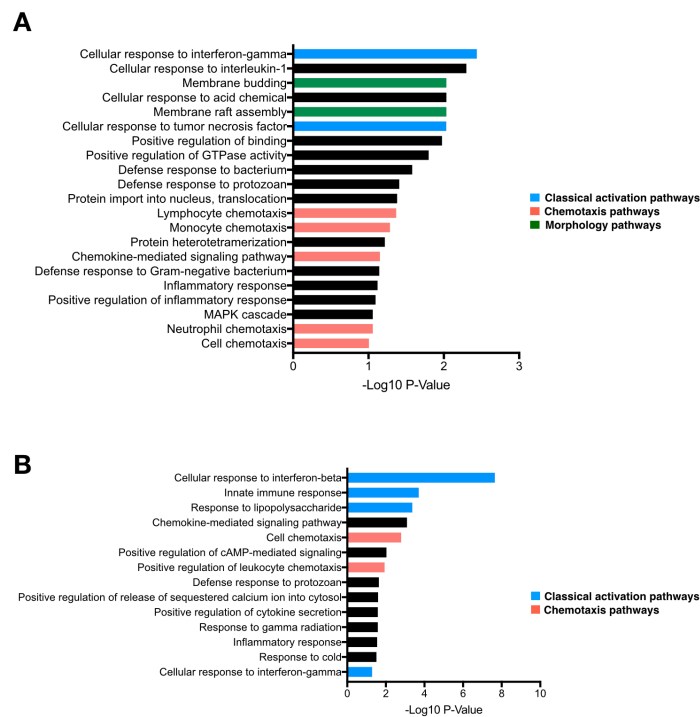

**Fig. S11: Response of Arg1+ macrophages to immunotherapy.** **A.** Intravital microscopy time lapse imaging showing the change in Arg1-eYFP macrophages (green) in MC38-H2B-mApple (red) tumors treated with aPD-1. Pacific Blue-dextran nanoparticle injected i.v. for TAM labeling (blue). **B.** Plot showing Arg1-eYFP expression quantified in the tumor core before and 72 hours after aPD-1 administration. **C.** Plot showing Arg1+ TAM circularity index at the tumor core. **D.** Plot showing Arg1+ TAM circularity index at the tumor periphery. Values represent mean  $\pm$  SEM. \*\*\*\*P < 0.0001.

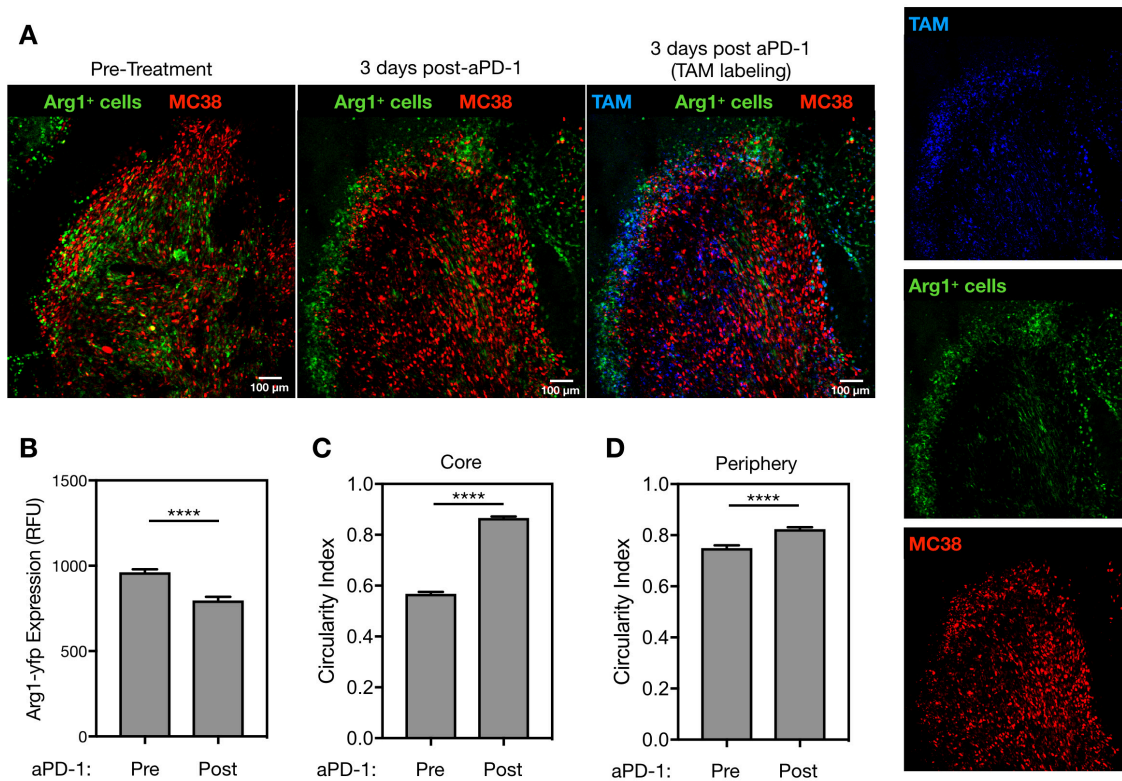

**Fig. S12: Statistical analysis of MC38 tumor growth studies.** Dot plots of MC38 tumors in C57BL/6 mice treated 8-12 days prior with vehicle control, aPD-1, ABH, or aPD-1+ABH combination. Values are presented as mean  $\pm$  S.E.M. \*P < 0.05, \*\*P < 0.01.

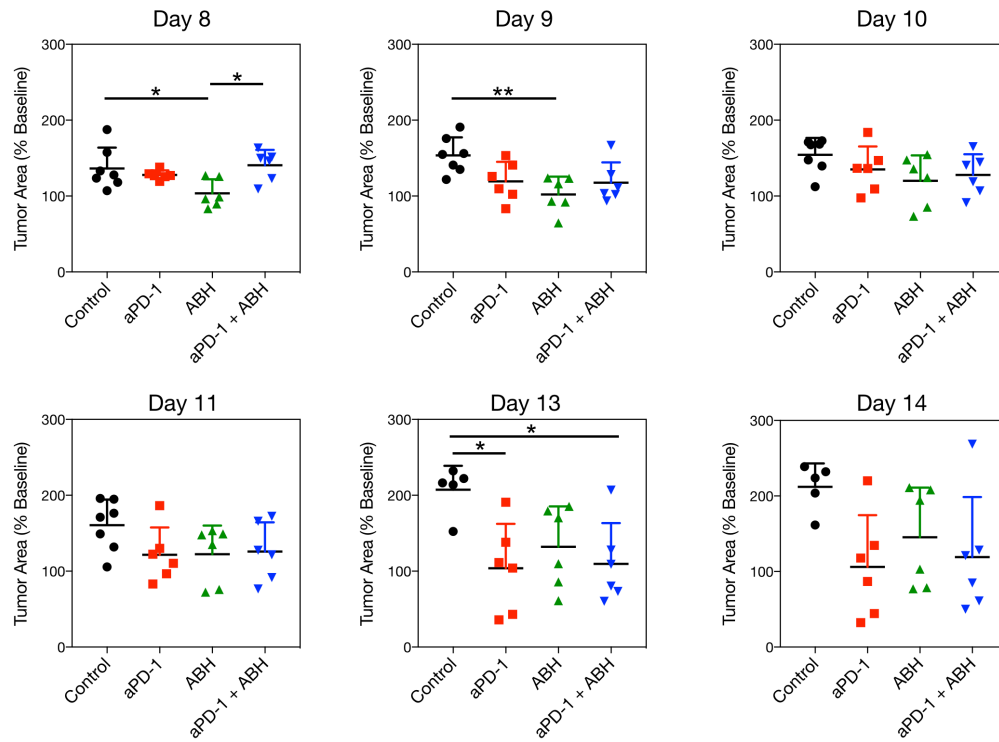

**Movie 1: Arg1+ macrophage morphological heterogeneity.** 3D rendering of intravital microscopy Z-stacks acquired near the margin of an MC38-H2B-mApple tumor in an Arg1-eYFP reporter mouse. Tumor cell nuclei (red), Arg1+ macrophages (green). Dimensions of the field of view are 85 by 85 by 30  $\mu\text{m}^3$ .

**Movie 2: Arg1+ macrophage motility revealed by in vivo time lapse microscopy.** Z-projected in vivo confocal microscopy movies acquired from Arg1-eYFP (green) reporter mice injected with Pacific Blue dextran (blue) for vascular labeling. MC38-H2B-mApple cells (red) shown at the tumor core.

**Movie 3: Arg1+ macrophage speed during observation.** The instantaneous speed of Arg1+ macrophages observed using in vivo confocal microscopy of Arg1-eYFP reporter mice. Regions were selected in the core of MC38-H2B-mApple tumors.
